# Supplementary material
Source: PubMed Central journal article supplement (PMC138601)

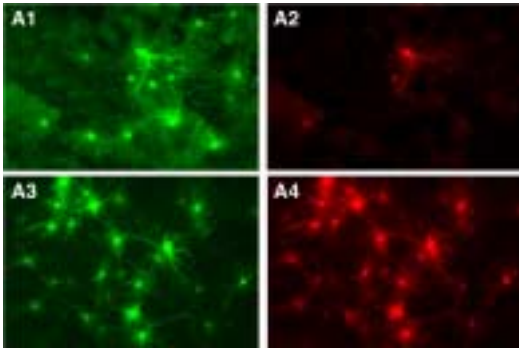

**B**

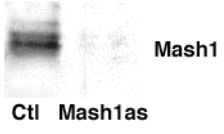

**C**

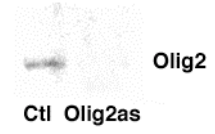

Supplement: pnas_232586699_2.pdf [file pnas_232586699_2.pdf]

**A**

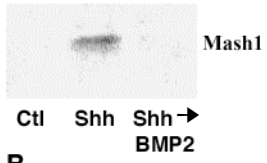

**B**

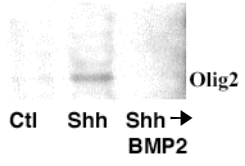

Supplement: pnas_232586699_4.pdf [file pnas_232586699_4.pdf]
